# Supplementary material
Source: publisher figshare collection journal article supplement (https://gsajournals.figshare.com/ndownloader/files/39494677)
Supplement: Supplementary file 1 [file 39494677]

## Sheet: Sheet1
Sample	CFW	Em/J
Index	atgacag	cacctcc
Total reads	138,399,108 (50.8%)	133,971,570 (49.2%)
Read pairs	69199554	66985785
Aligned read pairs	66741336	64749429
Total mapped reads	123,031,248 (88.9%)	119,848,393 (86.46%)
% mapped reads in exome	0.861	0.8645
% exome ≥ 5X coverage	0.9912	0.9901
% exome ≥ 10X coverage	0.9823	0.9819
% exome ≥ 25X coverage	0.931	0.9341
Unexpected gaps	chr4: 32 exons	chrY: 140 exons
